# Supplementary material for: Thromboembolisms in atrial fibrillation and heart failure patients with a preserved ejection fraction (HFpEF) compared to those with a reduced ejection fraction (HFrEF)
Source: Springer Nature journal article supplement (doi:10.1007/s00380-017-1073-5), 2017-10-24
Supplement: MOESM1 [file 15158996]

## Online supplemental Table 1. Hazard ratios of all-cause death in AF-HFpEF patients.

|  | **AF-HFpEF** | | | |
| --- | --- | --- | --- | --- |
| **Variable** | **Unadjusted**  **HR (95% CI)** | **P-value** | **Adjusted**  **HR (95% CI)** | **P-value** |
| Age | 1.04 (0.99 – 1.09) | 0.10 |  |  |
| <65 years | Reference |  | Reference |  |
| 65–74 years | 1.16 (0.76 – 1.80) | 0.49 | 1.84 (0.73 – 5.32) | 0.20 |
| ≥75 years | 1.36 (0.70 – 2.95) | 0.38 | 2.06 (0.88 – 5.73) | 0.09 |
| Female sex | 1.25 (0.59 – 2.65) | 0.56 | 1.06 (0.34 – 3.36) | 0.92 |
| Hypertension | 1.08 (0.46 – 2.54) | 0.86 | 0.53 (0.13 – 2.07) | 0.36 |
| Diabetes mellitus | 0.85 (0.40 – 1.83) | 0.69 | 0.72 (0.19 – 2.76) | 0.63 |
| Previous stroke | 1.05 (0.70 – 1.57) | 0.82 | 1.02 (0.56 – 1.87) | 0.95 |
| Vascular disease | 0.94 (0.36 – 2.46) | 0.90 | 1.12 (0.18 – 6.84) | 0.91 |
| Non-paroxysmal AF | 0.48 (0.21 – 1.14) | 0.10 |  |  |
| NYHA | 2.11 (0.49 – 9.08) | 0.32 |  |  |
| Hemoglobin | 0.87 (0.74 – 1.02) | 0.10 |  |  |
| Estimated GFR | 1.00 (0.99 – 1.02) | 0.60 |  |  |
| BNP | 1.00 (1.00 – 1.01) | <0.001 |  |  |
| <148 | Reference |  | Reference |  |
| 148–340 | 1.46 (0.39 – 5.48) | 0.58 | 1.70 (0.91 – 3.15) | 0.09 |
| ≥341 | 4.17 (1.19 – 14.6) | 0.03 | 1.90 (0.87 – 3.91) | 0.10 |
| LVEF | 1.04 (0.97 – 1.11) | 0.24 |  |  |
| LAD | 0.98 (0.94 – 1.03) | 0.38 |  |  |
| E/e’ | 1.02 (0.99 – 1.05) | 0.31 |  |  |
| Beta-blocker | 1.62 (0.74 – 3.56) | 0.23 |  |  |
| RAS antagonist | 0.52 (0.25 – 1.10) | 0.09 |  |  |
| Oral anticoagulant | 0.81 (0.39 – 1.68) | 0.57 |  |  |

HR, hazard ratio; CI, confidence interval. The other abbreviations are as in Table 1.

## Online supplemental Table 2. Hazard ratios of all-cause death in AF-HFrEF patients.

|  | **AF-HFrEF** | | | |
| --- | --- | --- | --- | --- |
| **Variable** | **Unadjusted**  **HR (95% CI)** | **P-value** | **Adjusted**  **HR (95% CI)** | **P-value** |
| Age | 1.04 (1.01 – 1.08) | 0.02 |  |  |
| <65 years | Reference |  | Reference |  |
| 65–74 years | 1.03 (0.62 – 1.74) | 0.89 | 1.16 (0.66 – 2.10) | 0.60 |
| ≥75 years | 2.17 (1.37 – 3.54) | <0.001 | 1.93 (1.13 – 3.35) | 0.02 |
| Female sex | 0.91 (0.43 – 1.94) | 0.82 | 1.09 (0.48 – 2.50) | 0.83 |
| Hypertension | 0.96 (0.48 – 1.91) | 0.91 | 0.54 (0.23 – 1.25) | 0.15 |
| Diabetes mellitus | 1.60 (0.84 – 3.05) | 0.16 | 1.88 (0.79 – 4.46) | 0.15 |
| Previous stroke | 1.35 (0.94 – 1.94) | 0.11 | 0.89 (0.54 – 1.44) | 0.63 |
| Vascular disease | 2.70 (1.40 – 5.18) | 0.003 | 2.37 (1.07 – 5.23) | 0.03 |
| Non-paroxysmal AF | 1.20 (0.43 – 3.38) | 0.73 |  |  |
| NYHA | 1.47 (0.65 – 3.35) | 0.36 |  |  |
| Hemoglobin – g/dl | 0.81 (0.72 – 0.90) | <0.001 |  |  |
| ≥13.3 | Reference |  | Reference |  |
| 11.3–13.2 | 2.75 (1.10 – 6.86) | 0.03 | 1.05 (0.52 – 2.13) | 0.90 |
| <11.3 | 4.36 (1.89 – 10.1) | <0.001 | 1.11 (0.51 – 2.35) | 0.80 |
| Estimated GFR – ml/min/1.73m2 | 0.95 (0.93 – 0.97) | <0.001 |  |  |
| ≥53.1 | Reference |  | Reference |  |
| 36.7–53.0 | 1.21 (0.91 – 2.02) | 0.13 | 1.77 (0.94 – 3.32) | 0.08 |
| <36.7 | 2.48 (1.23 – 5.00) | 0.01 | 3.46 (1.56 – 7.65) | 0.002 |
| BNP – pg/ml | 1.00 (1.00 – 1.01) | <0.001 |  |  |
| <148 | Reference |  | Reference |  |
| 148–340 | 1.27 (0.73 – 2.17) | 0.38 | 1.06 (0.66 – 1.54) | 0.48 |
| ≥341 | 2.73 (1.04 – 7.17) | 0.01 | 1.33 (1.04 – 1.88) | 0.03 |
| LVEF | 0.99 (0.96 – 1.03) | 0.85 |  |  |
| LAD | 1.01 (0.96 – 1.06) | 0.69 |  |  |
| E/e’ | 1.03 (1.00 – 1.06) | 0.03 |  |  |
| <11.4 | Reference |  | Reference |  |
| 11.4–18.3 | 0.59 (0.23 – 1.57) | 0.29 | 0.89 (0.48 – 1.64) | 0.71 |
| ≥18.4 | 1.34 (0.60 – 2.99) | 0.47 | 1.14 (0.59 – 2.24) | 0.70 |
| Beta-blocker | 1.09 (0.48 – 2.48) | 0.83 |  |  |
| RAS antagonist | 0.36 (0.18 – 0.73) | 0.005 | 0.58 (0.26 – 0.82) | 0.02 |
| Oral anticoagulant | 0.48 (0.24 – 0.93) | 0.03 | 1.04 (0.62 – 2.43) | 0.78 |

HR, hazard ratio; CI, confidence interval. The other abbreviations are as in Table 1.
